# Supplementary material
Source: publisher site journal article supplement (http://www.degruyter.com/publication/journal_key/JPEM/downloadAsset/JPEM_Publication%20Ethics%20and%20Publication%20Malpractice%20Statement.pdf)
Supplement: Supplementary file 1 [file JPEM_Publication%20Ethics%20and%20Publication%20Malpractice%20Statement.pdf]

## Publication Ethics and Publication Malpractice Statement

For all parties involved in the act of publishing (the author, the journal editor(s), the peer reviewer and the publisher) it is necessary to agree upon standards of expected ethical behavior. The ethics statements for our journal are based on the Committee on Publication Ethics (COPE) Best Practice Guidelines for Journal Editors.

### Duties of the Editors-in-Chief

#### Fair play

Submitted manuscripts are evaluated for their intellectual content without regard to race, gender, sexual orientation, religious belief, ethnic origin, citizenship, or political philosophy of the authors.

#### Confidentiality

The Editor-in-Chief and any editorial staff must not disclose any information about a submitted manuscript to anyone other than the corresponding author, reviewers, potential reviewers, other editorial advisers, and the publisher, as appropriate.

#### Disclosure and conflicts of interest

Unpublished materials disclosed in a submitted manuscript must not be used in an Editor's own research without the explicit written consent of the author(s).

#### Publication decisions

The handling Editor-in-Chief of the journal is responsible for deciding which of the submitted articles should be published. The Editor-in-Chief may be guided by the policies of the journal's Editorial Board and constrained by such legal requirements as shall then be in force regarding libel, copyright infringement and plagiarism. The Editor-in-Chief may confer with other editors or reviewers in making this decision.

### Duties of peer reviewers

#### Contribution to editorial decisions

Peer review assists the Editor-in-Chief in making editorial decisions and, through the editorial communication with the author, may also assist the author in improving the manuscript.

#### Promptness

Any invited referee who feels unqualified to review the research reported in a manuscript or knows that its timely review will be impossible should immediately notify the Editor-in-Chief so that alternative reviewers can be contacted.

#### Confidentiality

Any manuscripts received for review must be treated as confidential documents. They must not be shown to or discussed with others except if authorized by the Editor-in-Chief.

#### Standards of objectivity

Reviews should be conducted objectively. Personal criticism of the author is unacceptable. Referees should express their views clearly with appropriate supporting arguments.

#### Acknowledgement of sources

Reviewers should identify relevant published work that has not been cited by the authors. Any statement that an observation, derivation, or argument had been previously reported should be accompanied by the relevant citation. A reviewer should also call to the Editor's attention any substantial similarity or overlap between the manuscript under consideration and any other published data of which they have personal knowledge.

#### Disclosure and conflict of interest

Privileged information or ideas obtained through peer review must be kept confidential and not used for personal advantage. Reviewers should not consider evaluating manuscripts in which they have conflicts of interest resulting from competitive, collaborative, or other relationships or connections with any of the authors, companies, or institutions connected to the submission.

### Duties of authors

#### Reporting standards

Authors reporting results of original research should present an accurate account of the work performed as well as an objective discussion of its significance. Underlying data should be represented accurately in the manuscript. A paper should contain sufficient detail and references to permit others to replicate the work. Fraudulent or knowingly inaccurate statements constitute unethical behavior and are unacceptable.

#### Originality and Plagiarism

The authors should ensure that they have written entirely original works, and if the authors have used the work and/or words of others that this has been appropriately cited or quoted. The publisher provides an automated scan for plagiarism when a manuscript is submitted online. The Editors of the journal reserve their right to immediately reject manuscripts without peer-review in obvious cases of intended plagiarism. Concomitantly they may also impose a ban on authors prohibiting further submission of manuscripts for a period of two years.

#### Multiple, redundant or concurrent publication

An author should not in general publish manuscripts describing essentially the same research in more than one journal or primary publication. Parallel submission of the same manuscript to more than one journal constitutes unethical publishing behavior and is unacceptable.

#### Acknowledgement of sources

Proper acknowledgment of the work of others must always be given. Authors should also cite

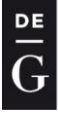

publications that have been influential in determining the nature of the reported work.

### **Authorship of a manuscript**

Authorship should be limited to those who have made a significant contribution to the conception, design, execution, or interpretation of the reported study. All those who have made significant contributions should be listed as co-authors. Where there are others who have participated in certain substantive aspects of the research project, they should be named in an Acknowledgement section.

The corresponding author should ensure that all appropriate co-authors (according to the above definition) and no inappropriate co-authors are included in the author list of the manuscript, and that all co-authors have seen and approved the final version of the paper and have agreed to its submission for publication. All co-authors must be clearly indicated as of the moment of manuscript submission. Adding co-authors at a later stage will not be accepted.

### **Hazards and human or animal subjects**

If the work involves chemicals, procedures or equipment that have any unusual hazards inherent in their use, the authors must clearly identify these in the manuscript. If the work involves the use of animal or human subjects, the author should ensure that the manuscript contains a statement that all procedures were performed in compliance with relevant laws and institutional guidelines and that the appropriate institutional committee(s) has approved them. Authors should include a statement in the manuscript that informed consent was obtained for experimentation with human subjects. The privacy rights of human subjects must always be observed.

### **Ethical conduct of research**

Work involving humans should comply with the principles laid down in the Declaration of Helsinki, as revised in 2013. At the end of the main text, the manuscript should contain a statement that the study has been approved by the Ethical Committee

of the institution where the study was performed, and that the study subjects, or their legal guardians, gave informed consent for participation in the study. When reporting experiments on animals, authors should indicate whether institutional and national standards for the care and use of laboratory animals were followed. Please note the Journal's Author Statement Information for further details and orientation in formulation.

### **Disclosure and conflicts of interest**

At the end of the main text, all authors should disclose in their manuscript any financial or other substantive conflict of interest that might be construed to influence the results or their interpretation in the manuscript. All sources of financial support for the project should be disclosed. Please note the Journal's Author Statement Information for further details and orientation in formulation.

### **Fundamental errors in published works**

When an author discovers a significant error or inaccuracy in his/her own published work, it is the author's obligation to promptly notify the journal's Editor-in-Chief or publisher and cooperate with them to either retract the paper or to publish an appropriate erratum.

### **Publisher's confirmation**

The Publisher and the Journal do not discriminate on the basis of age, color, religion, creed, disability, marital status, veteran status, national origin, race, gender, genetic predisposition or carrier status, or sexual orientation in its publishing programs, services and activities. In cases of alleged or proven scientific misconduct, fraudulent publication or plagiarism the publisher, in close collaboration with the Editors-in-Chief, will take all appropriate measures to clarify the situation and to amend the article in question. This includes the prompt publication of an erratum or, in the most severe cases, the complete retraction of the affected work.

### **In case of strong suspicion of fraudulent behavior concerning our journal's publications please contact us at our Editorial Office:**

Katharina Appelt  
Journal Manager Medicine  
DE GRUYTER  
Genthiner Straße  
1310785 Berlin, Germany  
T +49-30-26005 325  
[katharina.appelt@degruyter.com](mailto:katharina.appelt@degruyter.com)
